# 1 Environmental enteric dysfunction and small intestinal 2 histomorphology of stunted children in Bangladesh

3  
4 Md. Shabab Hossain<sup>1\*</sup>, S. M. Khodeza Nahar Begum<sup>2</sup>, M Masudur Rahman<sup>3</sup>, Mashud Parvez<sup>2</sup>, Ramendra  
5 Nath Mazumder<sup>1</sup>, Shafiqul Alam Sarker<sup>1</sup>, Md. Mehedi Hasan<sup>1</sup>, Shah Mohammad Fahim<sup>1</sup>, Md. Amran  
6 Gazi<sup>1</sup>, Subhasish Das<sup>1</sup>, Mustafa Mahfuz<sup>1</sup>, Tahmeed Ahmed<sup>1,4,5</sup>

7  
8 <sup>1</sup>Nutrition and Clinical Services Division, International Centre for Diarrheal Disease Research, Bangladesh  
9 (icddr,b), Dhaka, Bangladesh

10 <sup>2</sup>Department of Pathology, Bangladesh Specialized Hospital, Dhaka, Bangladesh

11 <sup>3</sup>Department of Gastroenterology, Sheikh Russel National Gastroenterology Institute and Hospital, Dhaka,  
12 Bangladesh

13 <sup>4</sup>Department of Global Health, University of Washington, Seattle, Washington, USA

14 <sup>5</sup>Department of Public Health Nutrition, James P Grant School of Public Health, BRAC University, Dhaka  
15 1212, Bangladesh

16  
17 **\*Corresponding author:**

18 Email: [dr.shabab@icddr.org](mailto:dr.shabab@icddr.org)

## 22 **Abstract**

23 There is lack of information on the histological characteristics of the intestinal mucosa in Bangladeshi  
24 children, which is considered to be the traditional gold standard for diagnosis of environmental enteric  
25 dysfunction (EED). The purpose of the study was to evaluate the intestinal histological characteristics of  
26 stunted children aged between 12-18 months with possible EED. 110 children with chronic malnutrition  
27 (52 stunted with length-for-age Z score, LAZ<-2 and 58 at risk of stunting with LAZ <-1 to -2) from the  
28 Bangladesh Environmental Enteric Dysfunction (BEED) study protocol who underwent upper  
29 gastrointestinal (GI) endoscopy were selected for this study. To explore the association of EED with  
30 childhood stunting, upper GI endoscopy was done and the biopsy specimens were studied for  
31 histopathology. Villous height and crypt depth were measured and the presence and intensity of  
32 inflammatory infiltrates in the lamina propria was investigated. Bivariate analysis was performed to  
33 examine the relationship between stunting and histologic morphology. More than 90% children  
34 irrespective of nutritional status were diagnosed to have chronic non-specific duodenitis on  
35 histopathology. Half of the children from both groups had villous atrophy as well as crypt hyperplasia  
36 and lymphocytic infiltration was present in more than 90% children, irrespective of groups. However, no  
37 statistically significant difference was observed when compared between the groups. The prevalence of  
38 chronic non-specific duodenitis in Bangladeshi children, irrespective of nutritional status, was high. A  
39 significant number of these children had abnormal findings in intestinal histomorphology.

## 40 **Author Summary**

41 EED or environmental enteropathy, results in poor gut health and suboptimal child growth, and is  
42 considered to play a major role on childhood stunting in the tropics. Growth faltering due to decreased  
43 nutrient absorption as a result of alteration of small intestinal histological structure manifested as

44 blunting or atrophy of intestinal villi, hyperplasia or elongation of crypts and infiltration of inflammatory  
45 cells in the lamina propria, has been demonstrated as the basic characteristics of EED. The traditional  
46 gold standard for the diagnosis of EED is intestinal biopsy and assessment of the histomorphological  
47 alterations. There is lack of information on the histological characteristics of the intestinal mucosa in  
48 Bangladeshi children. The purpose of the study was to evaluate the intestinal histological characteristics  
49 of stunted children aged between 12-18 months with possible EED. 110 children with chronic  
50 malnutrition who underwent upper gastrointestinal (GI) endoscopy were selected for this study and the  
51 biopsy specimens were studied for histopathology. Villous height and crypt depth were measured and  
52 the presence and intensity of inflammatory infiltrates in the lamina propria was investigated. More than  
53 90% children irrespective of nutritional status were diagnosed to have chronic non-specific duodenitis.  
54 Half of the children from both groups had villous atrophy as well as crypt hyperplasia and lymphocytic  
55 infiltration was present in more than 90% children, irrespective of groups. However, no statistically  
56 significant difference was observed when compared between the groups.

57

## 58 **Introduction**

59 Malnutrition accounts for almost half of all under-five child deaths <sup>1</sup>, especially in lesser developed  
60 countries <sup>2</sup>. Chronic malnutrition is frequently manifested as linear growth failure or stunting <sup>3</sup>, affecting  
61 an estimated 150 million children below 5 years of age <sup>4</sup>. About one-third of children in developing  
62 countries are stunted, accounting for 14–17% of mortality in under-five children <sup>5</sup>. The survivors suffer  
63 from long-term sequelae including reduced neuro-developmental potential and poor cognitive function  
64 <sup>3</sup>. According to a meta-analysis, each year two-hundred million children fail to achieve their growth  
65 potential as a result of stunting <sup>6</sup>. Studies show that, children suffering from impaired linear growth  
66 during the first thousand days of life suffer from higher risk of chronic diseases and sub-optimal

67 cognitive development causing sub-standard academic performance and financial productivity in the  
68 subsequent phases of life <sup>7</sup>. Although Bangladesh has made substantial progress in terms of fighting  
69 malnutrition including stunting, with a reduction of stunting rates from 66% to 31% between the time  
70 period of 1990 and 2018, the prevalence rates of childhood stunting are still “very high” according to the  
71 criteria set by WHO <sup>8</sup>.

72  
73 There is high prevalence of chronic intestinal inflammation in the tropical parts of the world. The  
74 structural and functional abnormality of the child gut in this part of the world is also established <sup>5</sup>.  
75 Certain changes in the small bowel function has been observed in the early phases of life in stunted  
76 children residing in developing countries, which is indicated by a change in the mucosal architecture of  
77 the intestine and chronic inflammation <sup>9</sup>. These alterations appear to be caused because of prolonged  
78 exposure to a contaminated environment. However, the reversal of this condition has been observed in  
79 studies conducted earlier. These studies show that when a non-native person returns to their origins,  
80 even following a prolonged residence in a resource-poor setting, the gut alterations reverse back to  
81 normal. This led researchers to suggest the exposure to a contaminated environment to be responsible  
82 for such alterations <sup>9,10,11</sup>, and the changes in mucosal architecture and intestinal inflammation is  
83 assumed to be the result of a prolonged exposure to enteric pathogens through fecal contamination,  
84 known as environmental enteric dysfunction (EED) <sup>9</sup>.

85  
86 EED, also recognized as environmental enteropathy or tropical enteropathy, results in poor gut health  
87 and suboptimal child growth <sup>12</sup>, and is considered to play a major role on childhood stunting in the  
88 tropics <sup>3</sup>. The mechanism of EED has been described earlier in many studies <sup>7,13</sup>. Growth faltering due to  
89 decreased nutrient absorption as a result of alteration of small intestinal histological structure  
90 manifested as blunting or atrophy of intestinal villi, hyperplasia or elongation of crypts and infiltration of

91 inflammatory cells in the lamina propria, has been demonstrated as the basic characteristics of EED <sup>14</sup>.  
92 EED is a clinically asymptomatic condition, and is only manifested visibly as growth impairment. The  
93 traditional gold standard for the diagnosis of EED is intestinal biopsy and assessment of the  
94 histomorphological alterations <sup>15</sup>. It is evident that because of the invasive nature of the procedure of  
95 collecting intestinal biopsy samples, especially in young, apparently asymptomatic children, <sup>7</sup> the  
96 number of studies conducted to investigate this are very limited. The small number of studies that  
97 aimed to explore this have found blunting of the intestinal villi, increase in the depth of the crypts and  
98 infiltration of inflammatory cells in the lamina propria of intestinal biopsy samples as the key hallmarks  
99 of EED <sup>15</sup>.  
100 There is insufficient information on the intestinal histological morphology of stunted children with  
101 possible EED in Bangladesh. With an aim to mitigate this knowledge gap, we sought to explore these  
102 parameters in children aged between 12-18 months of age.

103

## 104 **Materials and methods**

### 105 **Study site and Data collection**

106 This study is a part of the Bangladesh Environmental Enteric Dysfunction (BEED) study which was  
107 conducted among the residents of *Bauniabadh* slum in Mirpur, Dhaka. BEED study was a community-  
108 based nutrition intervention study targeted at validating non-invasive biomarkers of EED with small  
109 intestinal biopsy samples and to have a better understanding of the disease pathogenesis. In this study,  
110 children aged between 12-18 months, who are stunted (length-for-age Z-scores (LAZ) <-2) and those  
111 who are at risk of stunting (LAZ <-1 to -2) were enrolled. The participants received on site nutritional  
112 intervention for 90 days consisting of one egg, 150 ml of whole milk and micronutrient sprinkles, as well  
113 as, nutritional counseling daily, six days a week. The details and overall design of the BEED study have

114 already been published <sup>16</sup>. Participants failing to respond to nutritional therapy and also negative for  
115 secondary malnutrition, i.e. tuberculosis, parasitic infection were considered as probable cases of EED  
116 and upper GI endoscopy was performed. For this particular study, a total of 110 children (52 stunted, 58  
117 at risk of stunting) were enrolled from July 2016 to March 2019. Ethical approval was taken from  
118 Institutional review committee of icddr,b. The protocol number is PR-16007. A written informed consent  
119 for the intervention as well as the upper GI endoscopy and biopsy was obtained from the parents of  
120 children after explaining the aims and procedures of the study.

121

## 122 **Duodenal biopsy**

123 Pediatric UGI endoscopy procedures were performed by expert endoscopists (MMR and MRB) at the  
124 Apollo Hospitals, Dhaka and Bangladesh Specialized Hospital, Dhaka using Olympus GIF Type Q180Z  
125 scope under general anesthesia. Biopsy specimens were collected from the duodenal bulb using Radial  
126 Jaw™ 4 Pediatric 2.0 mm single use biopsy forceps (Boston Scientific Corporation, Marlborough, USA)  
127 and were kept in 10% buffered formalin solution containing vials for the purpose of fixation. Paraffin  
128 sections were prepared and stained by hematoxylin and eosin. All biopsies were examined by expert  
129 pathologists (KNB and MP), who were absolutely blinded to the case histories. Estimation of the villous  
130 height, crypt depth and presence and intensity of inflammatory infiltrates in lamina propria as well as  
131 counting of the intraepithelial lymphocytes (IELs) was done <sup>17</sup>.

132

## 133 **Definition of duodenitis and evaluation of intestinal histo-morphology**

134 The definitions and classification of duodenitis used in this study have already been published elsewhere  
135 <sup>18</sup>. Non-specific duodenitis was defined as the inflammation and morphological alterations of the  
136 duodenal mucosa, not known to be associated with any other pathology <sup>19</sup>. Specific or secondary

137 duodenitis was defined as the presence of inflammation and similar alterations of the duodenal mucosa  
138 due to a disease; for instance, Crohn's disease, sarcoidosis, etc <sup>20</sup>. Whether the duodenitis was active  
139 (chronic active duodenitis) or not was determined on the basis of the presence of neutrophilic  
140 infiltration or polymorphonuclear invasion, characterized by epithelial degeneration and regeneration  
141 with intercellular edema <sup>21</sup>. Figure 1 shows the classification of duodenitis based on pathogenesis and  
142 cellular activity <sup>18</sup>.

143

144 **Figure 1.** Classification of duodenitis based on pathogenesis and cellular activity

145

146 As reported in several studies <sup>5, 12, 13, 14, 22, 23</sup>, morphometry of intestinal histology consisted of certain  
147 estimations related to remodeling of the crypts and villi with inflammatory infiltrations in the lamina  
148 propria. The schemes used to assess the morphological alterations in this study were also based on  
149 these parameters, which has already been published elsewhere <sup>18</sup>. Shortening of the villous height was  
150 indicated by flattening of the mucosal surface secondary to the atrophy of the villi and was referred to  
151 as villous atrophy or blunting. Crypt changes consisted of elongation of the crypts or hyperplastic crypts  
152 <sup>24</sup>. Complete flattening of the villi with a V:C ratio varying from 0:1 to 1:1 was defined as total villous  
153 atrophy, while partial blunting of the villi and a mild reduction of the villous height than normal,  
154 respectively, were referred to as subtotal and mild villous atrophy <sup>24</sup>.

155

156 The lamina propria usually consists of plasma cells and lymphocytes, even in absence of active  
157 inflammation <sup>24</sup>. Slides having an obvious presence of excess inflammatory cellular infiltrates than  
158 normal as estimated by expert eye were considered. The presence and intensity of inflammatory cellular

159 infiltrates was further divided into marked cellular infiltration, moderate cellular infiltration and mild  
160 cellular infiltration through microscopic exploration<sup>18</sup>. An intense and diffuse inflammatory infiltration  
161 that was clearly distinguishable on naked eye was referred to as marked cellular infiltration while  
162 moderate cellular infiltration was defined as the presence of a lymphoid aggregation or follicle. A higher  
163 number of infiltrates than normal was defined as mild cellular infiltration. Figure 2 shows the schematic  
164 representation used for the assessment of the morphological changes described above<sup>18</sup>.

165

166 **Figure 2.** Schematic presentation for assessment of the histological alterations of intestinal mucosa

167

168 Increased numbers of IELs in an otherwise normal duodenal biopsy sample usually indicates certain  
169 immunological conditions; such as, lymphocytic/collagenous colitis, bacterial overgrowth and gluten  
170 sensitive enteropathy. Above 30 IELs/100 enterocytes was considered as intraepithelial lymphocytosis.  
171 IELs were estimated by counting the number of lymphocytes per 20 enterocytes present on a random  
172 villous tip, following the summation of the numbers of these lymphocytes from such 5 random villi<sup>24</sup>. 20  
173 enterocytes multiplied by 5 villi resulted in the number of lymphocytes per 100 enterocytes. Subjective  
174 morphologic analysis of the mucosal surface architecture was done using LEICA DM 1000 LED  
175 microscope.

176

## 177 **Statistical analyses**

178 Mean values, standard deviation (SD) and 95% confidence intervals (CI) of means were used to describe  
179 the distribution and prevalence and bivariate analysis was performed to explore the relation between  
180 malnutrition and the histological features. Pearson's chi-square test or Fisher's exact test, whichever  
181 applicable, was used to compare the distribution of duodenitis and the histological features between



182 the stunted and at risk of stunting children. Statistical significance was defined as a p-value of less than  
183 0.05. Statistical analyses were performed using SPSS version 20.0 (IBM).

184

## 185 **Results**

186 110 children (52 stunted, 58 at risk of stunting) with mean age of 18±2 months underwent upper GI  
187 endoscopy. Among them, 64 (58.2%) children were female. Representative histological images of  
188 normal villous architecture, mild villous atrophy, subtotal villous atrophy and total villous atrophy with  
189 crypt hyperplasia obtained using hematoxylin and eosin (H&E) stain are shown in Fig. 3 a, b, c and d  
190 respectively.

191

192 **Figure 3.** Representative histological images of villous height obtained using hematoxylin and eosin  
193 (H&E) stain

194

195 On histopathology, most of the children from both stunted and at risk of stunting groups suffered from  
196 chronic non-specific duodenitis. The proportion of chronic duodenitis and chronic active duodenitis in  
197 both groups were similar and no statistically significant difference existed between the groups. A small  
198 number of children belonging to both stunted and at risk of stunting cohorts were found to have  
199 abnormal intra-epithelial lymphocyte count in the biopsy samples. Presence of duodenitis did not differ  
200 significantly between the two groups of children. Table 1 shows the distribution of duodenitis in  
201 children.

202

203 **Table 1.** Types of duodenitis in children

204

| Duodenitis                                        | Child Cohort     |                  |          |
|---------------------------------------------------|------------------|------------------|----------|
|                                                   | Stunted (†n= 52) | At risk (†n= 58) | †P-value |
| <b>Based on known pathology</b>                   |                  |                  |          |
| Normal                                            | 3 (6%)           | 3 (5%)           | 1.00     |
| Specific                                          | 0 (0%)           | 0 (0%)           | -        |
| Non-specific                                      | 49 (94%)         | 55 (95%)         | 0.62     |
| <b>Based on tissue morphology</b>                 |                  |                  |          |
| Normal                                            | 3 (6%)           | 3 (5%)           | 1.00     |
| Chronic                                           | 27(52%)          | 26 (45%)         | 0.46     |
| Chronic active                                    | 22 (42%)         | 29 (50%)         | 0.42     |
| <b>Intraepithelial lymphocytosis</b><br>(†IEL>30) | 2 (4%)           | 3 (5%)           | 1.00     |

205

206 † n, Number of respondents; P-value, Significance level; IEL, Intraepithelial lymphocytosis

207

208 Morphology analysis shows, half of the children from both stunted and at risk of stunting groups had  
 209 villous atrophy as well as crypt hyperplasia. Lymphocytic infiltration was present in more than 90%  
 210 children, irrespective of groups. However, no statistically significant difference was observed between  
 211 the groups. Figure 4 shows the morphologic distribution of histopathology findings.

212

213 **Figure 4.** Histomorphological features of upper GI mucosa in children with stunting

214

## 215 Discussion

216 This study showed a high prevalence of non-specific duodenitis on histopathology in children  
217 irrespective of their nutritional status. The finding is novel as after a thorough literature search, it was  
218 observed that there is paucity of data on the prevalence of duodenitis in this entire geographic region.  
219 Numerous studies were conducted to investigate pathologies of the stomach and esophagus<sup>25</sup>, but only  
220 a few explored duodenal pathologies, especially in children<sup>25</sup>. A similar study on malnourished adults  
221 has revealed very high prevalence of non-specific duodenitis based on histopathological evidence<sup>18</sup>. A  
222 study aimed to explore *H. pylori* associated dyspepsia in children residing in urban slums has also shown  
223 a high prevalence of asymptomatic duodenitis<sup>26</sup>. Studies based on esophagogastroduodenoscopy (EGD)  
224 procedures on US and Turkish children showed the prevalence of duodenitis to be 12.7% and 30.3%,  
225 respectively<sup>25,27</sup>. However, in contrast to stunted or at risk of stunting children in the present study, the  
226 children in those studies were relatively older, well-nourished and underwent EGD for diagnostic  
227 purpose. The commonest etiology responsible for duodenitis in studies conducted in Western countries  
228 was found to be celiac disease (CD), which accounted for 32% of the total cases<sup>28</sup>. No children in the  
229 present study were found positive for celiac disease on serology<sup>29</sup> and the IEL count was also  
230 insignificant, which is an important histopathologic marker of CD<sup>30</sup>. As the unique feature for all the  
231 children was only being stunted or at risk of stunting and they also did not have any pathology  
232 diagnosed by endoscopy, the high prevalence of duodenitis among these children was possibly related  
233 to EED and not due to celiac disease or any other GI disease<sup>16</sup>. This also partly explains the high  
234 prevalence of the non-specific form of chronic duodenitis in the studied children, as the etiology could  
235 not be directly linked to any disease process. As the children underwent endoscopy to address the  
236 association of EED with stunting and not because of any known gastro-intestinal pathology, diagnosis of  
237 duodenitis with a specific etiology or specific duodenitis, would also be highly unlikely.

238

239 Approximately half of the children from both stunted and at risk of stunting cohorts had abnormal  
240 villous height as well as crypt depth. And lymphocytic infiltration was found to be present in majority of  
241 the participants, irrespective of groups. These findings are novel because this study is the first of its kind  
242 to explore the gut histomorphology in stunted children of this age group in Bangladesh. There are  
243 ethical challenges to obtain biopsy tissue from the intestine of young children without an evident clinical  
244 condition<sup>9</sup>. As a result, a thorough literature search yielded very limited studies that have been  
245 conducted on asymptomatic children suffering solely from chronic malnutrition. A study done on 38  
246 Gambian children suffering from protein energy malnutrition (PEM) had also shown that most of the  
247 children had villous atrophy or crypt elongation<sup>31</sup>. Further studies aimed at obtaining serial biopsy  
248 samples at different ages and biopsy sites would be of great scientific value<sup>9</sup>. No statistical significance  
249 was observed in terms of both duodenitis and intestinal histological morphology when both the groups  
250 were compared. As already mentioned, collection of small intestinal biopsy samples is an invasive  
251 procedure and hence is ethically and technically infeasible, particularly in young children without an  
252 evident clinical condition<sup>7</sup>. As a result, biopsy samples from absolutely 'healthy' children could not be  
253 obtained. The comparison group here was at risk of stunting, and not a proper 'healthy' cohort, which  
254 could have yielded a better result.

255  
256 From the morphological analysis it is evident that, nearly half of the children from both the groups had  
257 significant alterations in the intestinal histomorphology. As no other pathology which could have made a  
258 direct impact on these mucosal changes could be identified in these clinically asymptomatic children,  
259 EED may be a factor related with these findings. The children were provided with an intensive  
260 nutritional intervention prior to endoscopy as well as screened negative for other possible causes of  
261 malnutrition, yet, the children were stunted. Considering both the unexplained stunting and intestinal

262 histomorphologic changes in the same children, EED might be the linking bridge and might also be a  
263 possible explanation. Thus, further studies associating EED markers with gut histomorphology in stunted  
264 children are warranted.

265

## 266 **Limitations**

267 This study was conducted as a sub-study of the Bangladesh Environmental Enteric Dysfunction (BEED)  
268 study where the studied population of the parent study were only stunted (length-for-age Z-scores (LAZ)  
269 <-2) and at risk of stunting (LAZ <-1 to -2) children and therefore, by definition were not absolutely  
270 healthy. As collection of small intestinal biopsy samples in young children without an evident clinical  
271 condition is ethically infeasible, biopsy samples from absolutely 'healthy' children could not be obtained.  
272 Therefore, the comparison group was at risk of stunting, and not a proper 'healthy' cohort, which could  
273 have yielded a better result. Whether any association between EED markers with gut histomorphology  
274 exists or not was also not investigated, which also remained a limitation.

275

## 276 **Conclusion**

277 Based on histopathology of the intestinal biopsy samples, chronic non-specific duodenitis was found to  
278 be very high in Bangladeshi children, irrespective of nutritional status. A significant number of these  
279 children had abnormal morphological findings in intestinal histopathology. As no other pathology could  
280 be identified in these children, EED may be a possible factor related to these findings, warranting further  
281 studies to establish this as a fact.

282

## 283 **Acknowledgements**

284 This work was supported, in whole or in part, by the Bill & Melinda Gates Foundation [OPP1136751] and  
285 was funded by the Bill and Melinda Gates Foundation (BMGF) under its Global Health Program and the  
286 project investment ID is OPP1136751 ([https://www.gatesfoundation.org/How-We-Work/Quick-](https://www.gatesfoundation.org/How-We-Work/Quick-Links/Grants-Database/Grants/2015/11/OPP1136751)  
287 [Links/Grants-Database/Grants/2015/11/OPP1136751](https://www.gatesfoundation.org/How-We-Work/Quick-Links/Grants-Database/Grants/2015/11/OPP1136751)). Under the grant conditions of the Foundation, a  
288 Creative Commons Attribution 4.0 Generic License has already been assigned to the Author Accepted  
289 Manuscript version that might arise from this submission. icddr,b acknowledges with gratitude the  
290 commitment of BMGF to its research efforts. We express our sincere gratitude to our pediatric  
291 endoscopist, unfortunately who is no longer with us, late Prof. Dr. Md Muzibur Rahman Bhuiyan, former  
292 Senior Consultant, Department of Gastroenterology, Apollo Hospitals, Dhaka, Bangladesh. We express  
293 our sincere thanks to our colleagues at icddr,b and the study participants. icddr,b acknowledges with  
294 gratitude the commitment of the University of Virginia, Washington University in St. Louis, Dhaka  
295 Medical College and Hospital, Bangabandhu Sheikh Mujib Medical University, Dhaka Shishu Hospital,  
296 Bangladesh Specialised Hospital and Apollo Hospital, Dhaka to its research efforts. icddr,b is also grateful  
297 to the Governments of Bangladesh, Canada, Sweden and the UK for providing core/unrestricted  
298 support.

299

## 300 **Financial Support**

301 This work was supported by the Bill & Melinda Gates Foundation [OPP1136751] and was funded by the  
302 Bill and Melinda Gates Foundation (BMGF) under its Global Health Program and the project investment  
303 ID is OPP1136751 ([https://www.gatesfoundation.org/How-We-Work/Quick-Links/Grants-](https://www.gatesfoundation.org/How-We-Work/Quick-Links/Grants-Database/Grants/2015/11/OPP1136751)  
304 [Database/Grants/2015/11/OPP1136751](https://www.gatesfoundation.org/How-We-Work/Quick-Links/Grants-Database/Grants/2015/11/OPP1136751)).

305

## 306 **Competing Interests**

307 The authors declared no conflict of interest.

308

### 309 **Trial registration number**

310 ClinicalTrials.gov ID: NCT02812615

311 (<https://clinicaltrials.gov/ct2/results?cond=NCT02812615&term=&cntry=&state=&city=&dist=>)

312 Date of first registration: 24/06/2016

313

## 314 **References**

- 315 1. Black RE, Victora CG, Walker SP, Bhutta ZA, Christian P, De Onis M, Ezzati M, Grantham-  
316 McGregor S, Katz J, Martorell R, 2013. Maternal and child undernutrition and overweight in low-  
317 income and middle-income countries. *The lancet* 382: 427-451.
- 318 2. Kane AV, Dinh DM, Ward HD, 2014. Childhood malnutrition and the intestinal microbiome.  
319 *Pediatric research* 77: 256.
- 320 3. Farràs M, Chandwe K, Mayneris-Perxachs J, Amadi B, Louis-Auguste J, Besa E, Zyambo K,  
321 Guerrant R, Kelly P, Swann JR, 2018. Characterizing the metabolic phenotype of intestinal villus  
322 blunting in Zambian children with severe acute malnutrition and persistent diarrhea. *PloS one*  
323 13: e0192092.
- 324 4. Fanzo J, Hawkes C, Udomkesmalee E, Afshin A, Allemandi L, Assery O, Baker P, Battersby J,  
325 Bhutta Z, Chen K, 2018. 2018 Global Nutrition Report: Shining a light to spur action on nutrition.
- 326 5. Amadi B, Besa E, Zyambo K, Kaonga P, Louis-Auguste J, Chandwe K, Tarr PI, Denno DM, Nataro  
327 JP, Faubion W, 2017. Impaired barrier function and autoantibody generation in malnutrition  
328 enteropathy in Zambia. *EBioMedicine* 22: 191-199.
- 329 6. Grantham-McGregor S, Cheung YB, Cueto S, Glewwe P, Richter L, Strupp B, Group ICDS, 2007.  
330 Developmental potential in the first 5 years for children in developing countries. *The lancet* 369:  
331 60-70.
- 332 7. Harper KM, Mutasa M, Prendergast AJ, Humphrey J, Manges AR, 2018. Environmental enteric  
333 dysfunction pathways and child stunting: A systematic review. *PLoS neglected tropical diseases*  
334 12: e0006205.
- 335 8. NIPORT M, 2014. Bangladesh Demographic and Health Survey BDHS 2014: Key Indicators.  
336 Dhaka, Bangladesh and Calverton, Maryland, USA: National Institute of Population Research and  
337 Training (NIPORT), Mitra and Associates, and ICF International.
- 338 9. Keusch GT, Rosenberg IH, Denno DM, Duggan C, Guerrant RL, Lavery JV, Tarr PI, Ward HD, Black  
339 RE, Nataro JP, 2013. Implications of acquired environmental enteric dysfunction for growth and

- 340 stunting in infants and children living in low-and middle-income countries. Food and nutrition  
341 bulletin 34: 357-364.
- 342 10. Lindenbaum J, Gerson CD, Kent TH, 1971. Recovery of small-intestinal structure and function  
343 after residence in the tropics: I. Studies in Peace Corps Volunteers. *Annals of Internal Medicine*  
344 74: 218-222.
- 345 11. Gerson CD, Kent TH, Saha JR, Siddiqi N, Lindenbaum J, 1971. Recovery of Small-Intestinal  
346 Structure and Function After Residence in the Tropics: II. Studies in Indians and Pakistanis Living  
347 in New York City. *Annals of internal medicine* 75: 41-48.
- 348 12. Louis-Auguste J, Greenwald S, Simuyandi M, Soko R, Banda R, Kelly P, 2014. High dose multiple  
349 micronutrient supplementation improves villous morphology in environmental enteropathy  
350 without HIV enteropathy: results from a double-blind randomised placebo controlled trial in  
351 Zambian adults. *BMC gastroenterology* 14: 15.
- 352 13. Kelly P, Menzies I, Crane R, Zulu I, Nickols C, Feakins R, Mwansa J, Mudenda V, Katubulushi M,  
353 Greenwald S, 2004. Responses of small intestinal architecture and function over time to  
354 environmental factors in a tropical population. *The American journal of tropical medicine and*  
355 *hygiene* 70: 412-419.
- 356 14. Owino V, Ahmed T, Freemark M, Kelly P, Loy A, Manary M, Loechl C, 2016. Environmental  
357 enteric dysfunction and growth failure/stunting in global child health. *Pediatrics* 138:  
358 e20160641.
- 359 15. Rogawski ET, Guerrant RL, 2017. The burden of enteropathy and “subclinical” infections.  
360 *Pediatric Clinics* 64: 815-836.
- 361 16. Mahfuz M, Das S, Mazumder RN, Rahman MM, Haque R, Bhuiyan MMR, Akhter H, Sarker MSA,  
362 Mondal D, Muaz SSA, 2017. Bangladesh Environmental Enteric Dysfunction (BEED) study:  
363 protocol for a community-based intervention study to validate non-invasive biomarkers of  
364 environmental enteric dysfunction. *BMJ open* 7: e017768.
- 365 17. Van Der Hulst RR, Von Meyenfeldt MF, Van Kreel BK, Thunnissen FB, Brummer R-JM, Arends J-  
366 W, Soeters PB, 1998. Gut permeability, intestinal morphology, and nutritional depletion.  
367 *Nutrition* 14: 1-6.
- 368 18. Hossain MS, Begum SKN, Rahman MM, Mazumder RN, Parvez M, Gazi MA, Hasan MM, Fahim  
369 SM, Das S, Mahfuz M, 2021. Alterations in the histological features of the intestinal mucosa in  
370 malnourished adults of Bangladesh. *Scientific Reports* 11: 1-8.
- 371 19. Whitehead R, Roca M, Meikle D, Skinner J, Truelove S, 1975. The histological classification of  
372 duodenitis in fiberoptic biopsy specimens. *Digestion* 13: 129-136.
- 373 20. Wang C-X, Liu L-J, Guan J, Zhao X-L, 2005. Ultrastructural changes in non-specific duodenitis.  
374 *World Journal of Gastroenterology: WJG* 11: 686.
- 375 21. Caselli M, Gaudio M, Chiamenti CM, Trevisani L, Sartori S, Saragoni L, Boldrini P, Dentale A,  
376 Ruina M, Alvisi V, 1998. Histologic findings and *Helicobacter pylori* in duodenal biopsies. *Journal*  
377 *of clinical gastroenterology* 26: 74-80.
- 378 22. Kelly P, Davies S, Mandanda B, Veitch A, McPhail G, Zulu I, Drobniewski F, Fuchs D, Summerbell  
379 C, Luo N, 1997. Enteropathy in Zambians with HIV related diarrhoea: regression modelling of  
380 potential determinants of mucosal damage. *Gut* 41: 811-816.
- 381 23. Kelly P, Besa E, Zyambo K, Louis-Auguste J, Lees J, Banda T, Soko R, Banda R, Amadi B, Watson A,  
382 2016. Endomicroscopic and transcriptomic analysis of impaired barrier function and  
383 malabsorption in environmental enteropathy. *PLoS neglected tropical diseases* 10: e0004600.
- 384 24. Serra S, Jani PA, 2006. An approach to duodenal biopsies. *Journal of clinical pathology* 59: 1133-  
385 1150.
- 386 25. Akbulut UE, Fidan S, Emeksiz HC, Ors OP, 2017. Duodenal pathologies in children: a single-center  
387 experience. *J Pediatr (Rio J)*.



- 388 26. Hossain MS, Das S, Begum S, Rahman MM, Mazumder RN, Gazi MA, Fahim SM, Mahfuz M,  
389 Haque R, Petri WA, 2020. Asymptomatic Duodenitis and Helicobacter pylori associated  
390 Dyspepsia in 2-Year-Old Chronic Malnourished Bangladeshi Slum-Dwelling Children: A Cross-  
391 Sectional Study. *Journal of Tropical Pediatrics*.
- 392 27. Alper A, Hardee S, Rojas-Velasquez D, Escalera S, Morotti RA, Pashankar DS, 2016. Prevalence,  
393 clinical, endoscopic and pathological features of duodenitis in children. *Journal of pediatric*  
394 *gastroenterology and nutrition* 62: 314.
- 395 28. Alper A, Hardee S, Rojas-Velasquez D, Escalera S, Morotti RA, Pashankar DS, 2016. Prevalence  
396 and Clinical, Endoscopic, and Pathological Features of Duodenitis in Children. *J Pediatr*  
397 *Gastroenterol Nutr* 62: 314-6.
- 398 29. Gazi MA, Das S, Mahfuz M, Hasan MM, Hossain MS, Fahim SM, Alam MA, Noor Z, Gilchrist CA,  
399 Petri WA, 2019. Screening for coeliac disease in children and adults living in a slum of Dhaka,  
400 Bangladesh. *BMJ open gastroenterology* 6: e000294.
- 401 30. Oberhuber G, Granditsch G, Vogelsang H, 1999. The histopathology of coeliac disease: time for a  
402 standardized report scheme for pathologists. *European journal of gastroenterology &*  
403 *hepatology* 11: 1185-1194.
- 404 31. Campbell DI, Murch SH, Elia M, Sullivan PB, Sanyang MS, Jobarteh B, Lunn PG, 2003. Chronic T  
405 cell-mediated enteropathy in rural west African children: relationship with nutritional status and  
406 small bowel function. *Pediatric research* 54: 306.

407

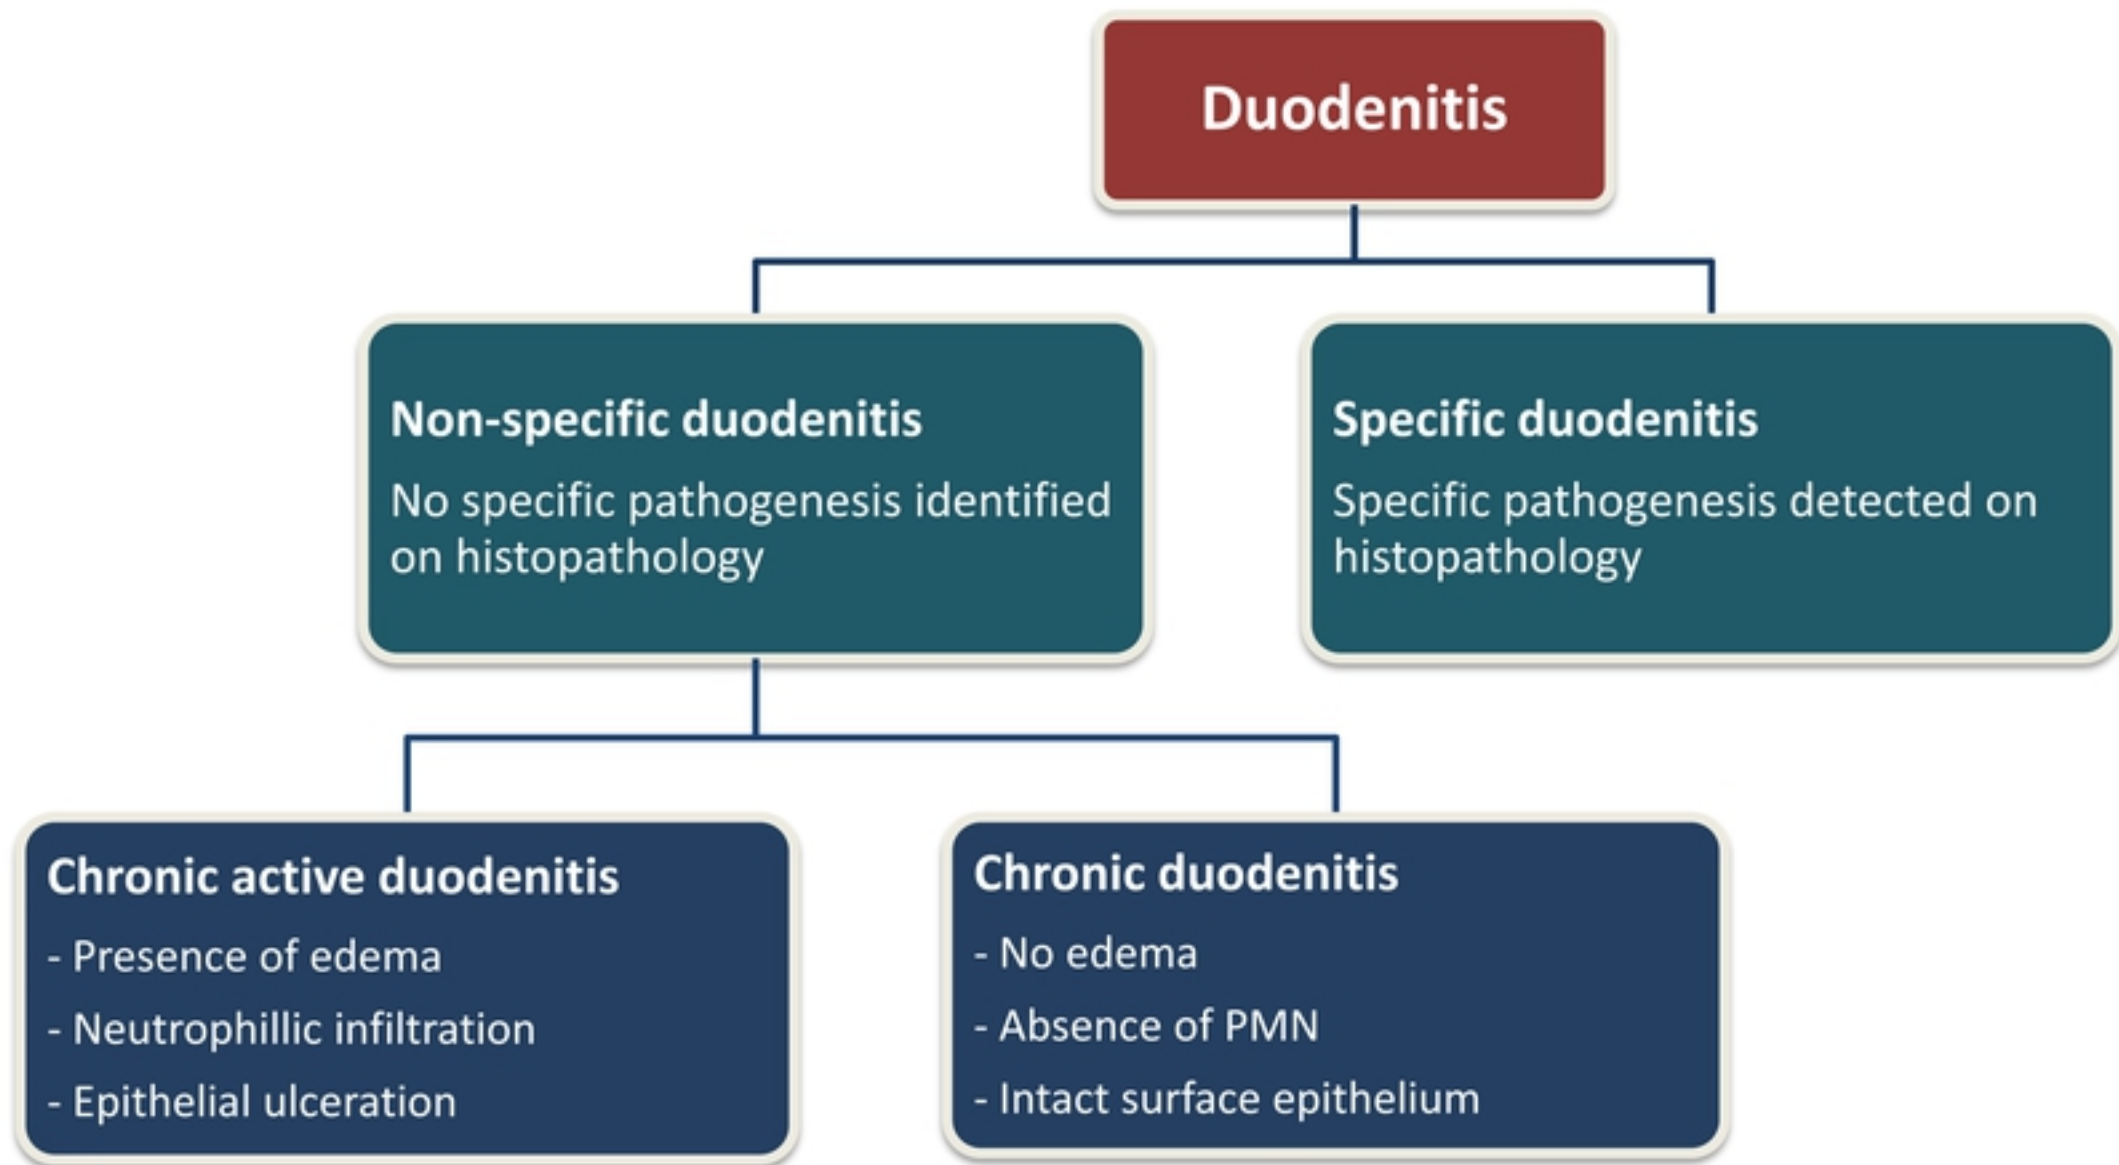

Figure 1

## Inflammatory infiltrates

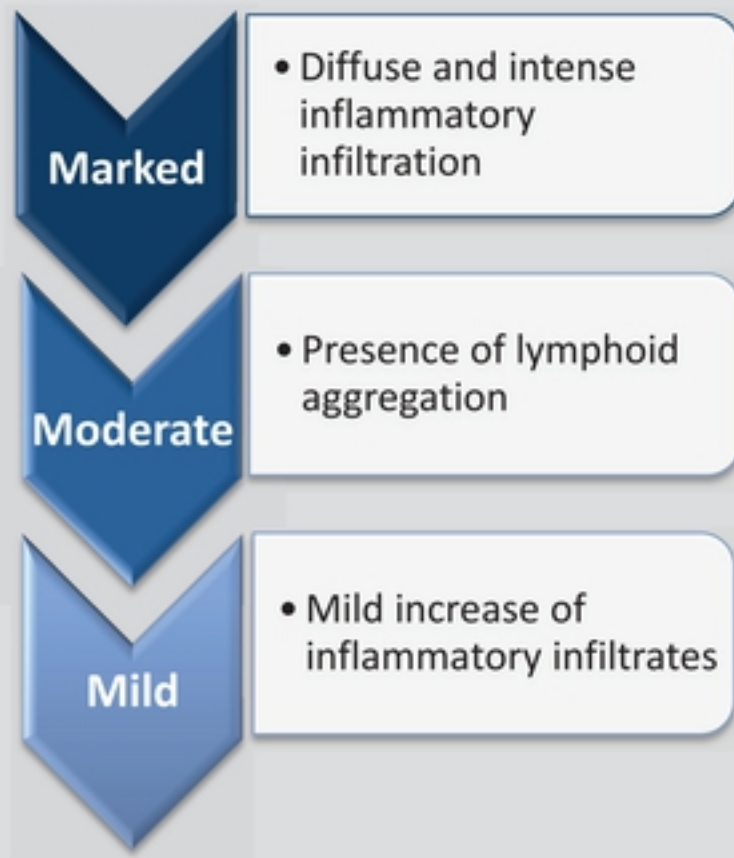

## Villous atrophy

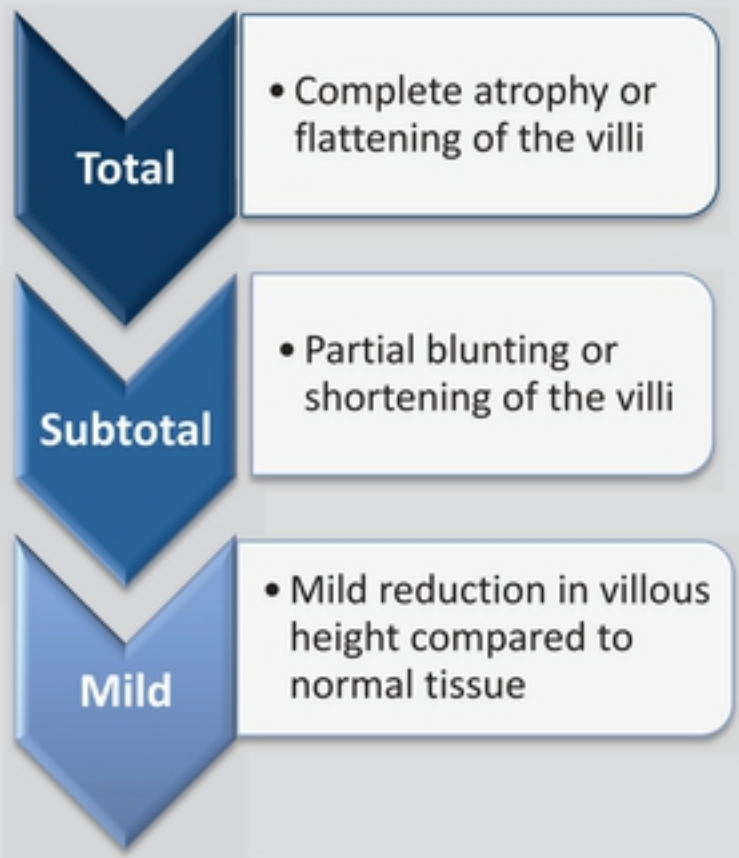

## Crypt hyperplasia

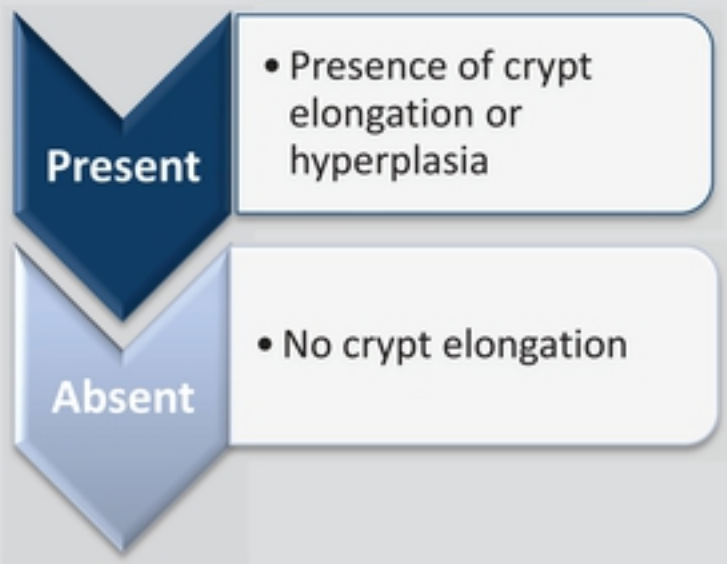

Figure 2

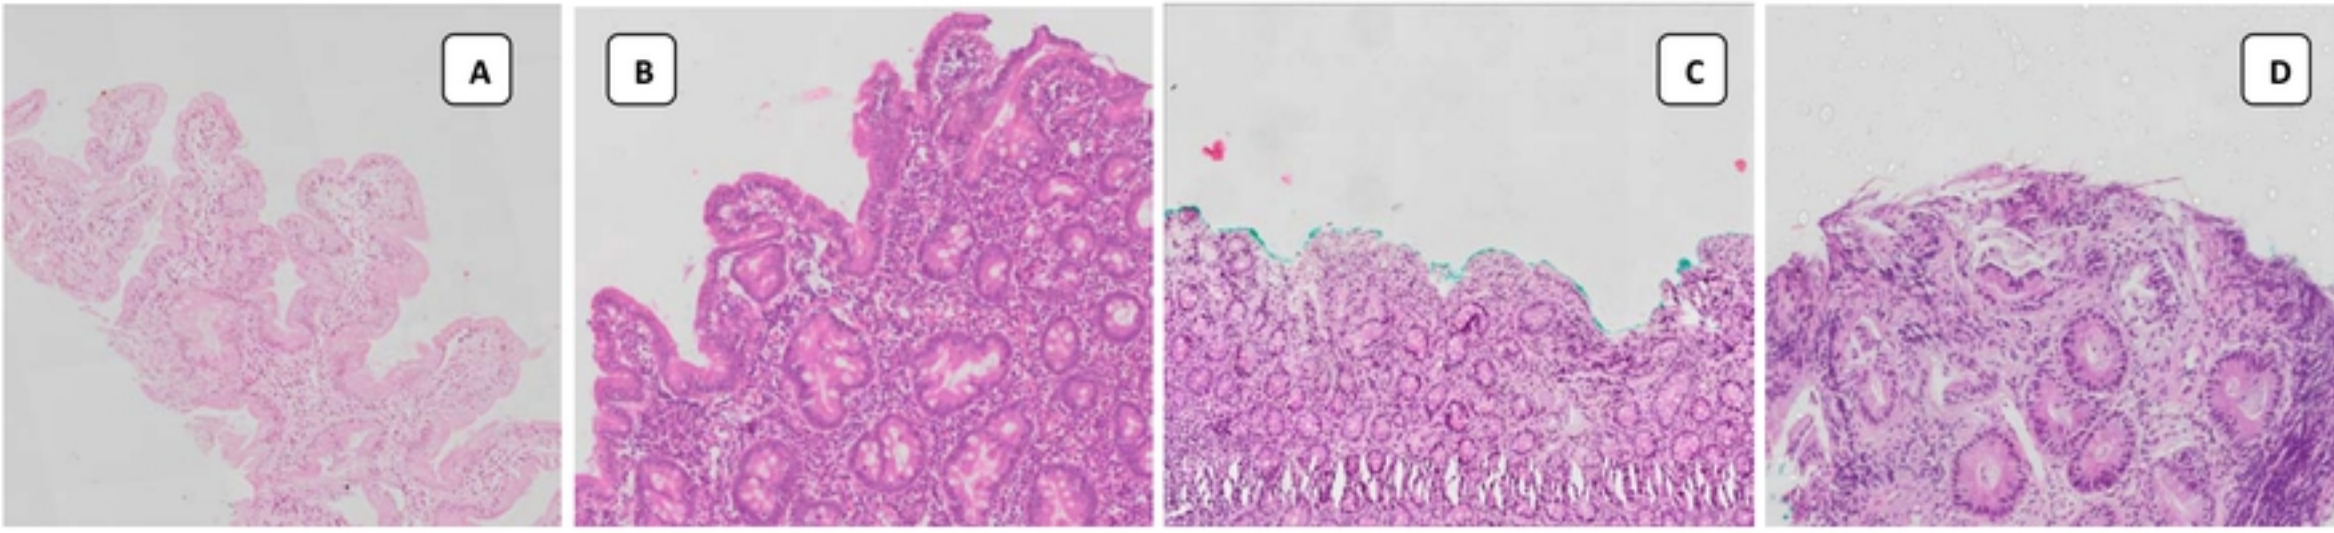

Figure 3

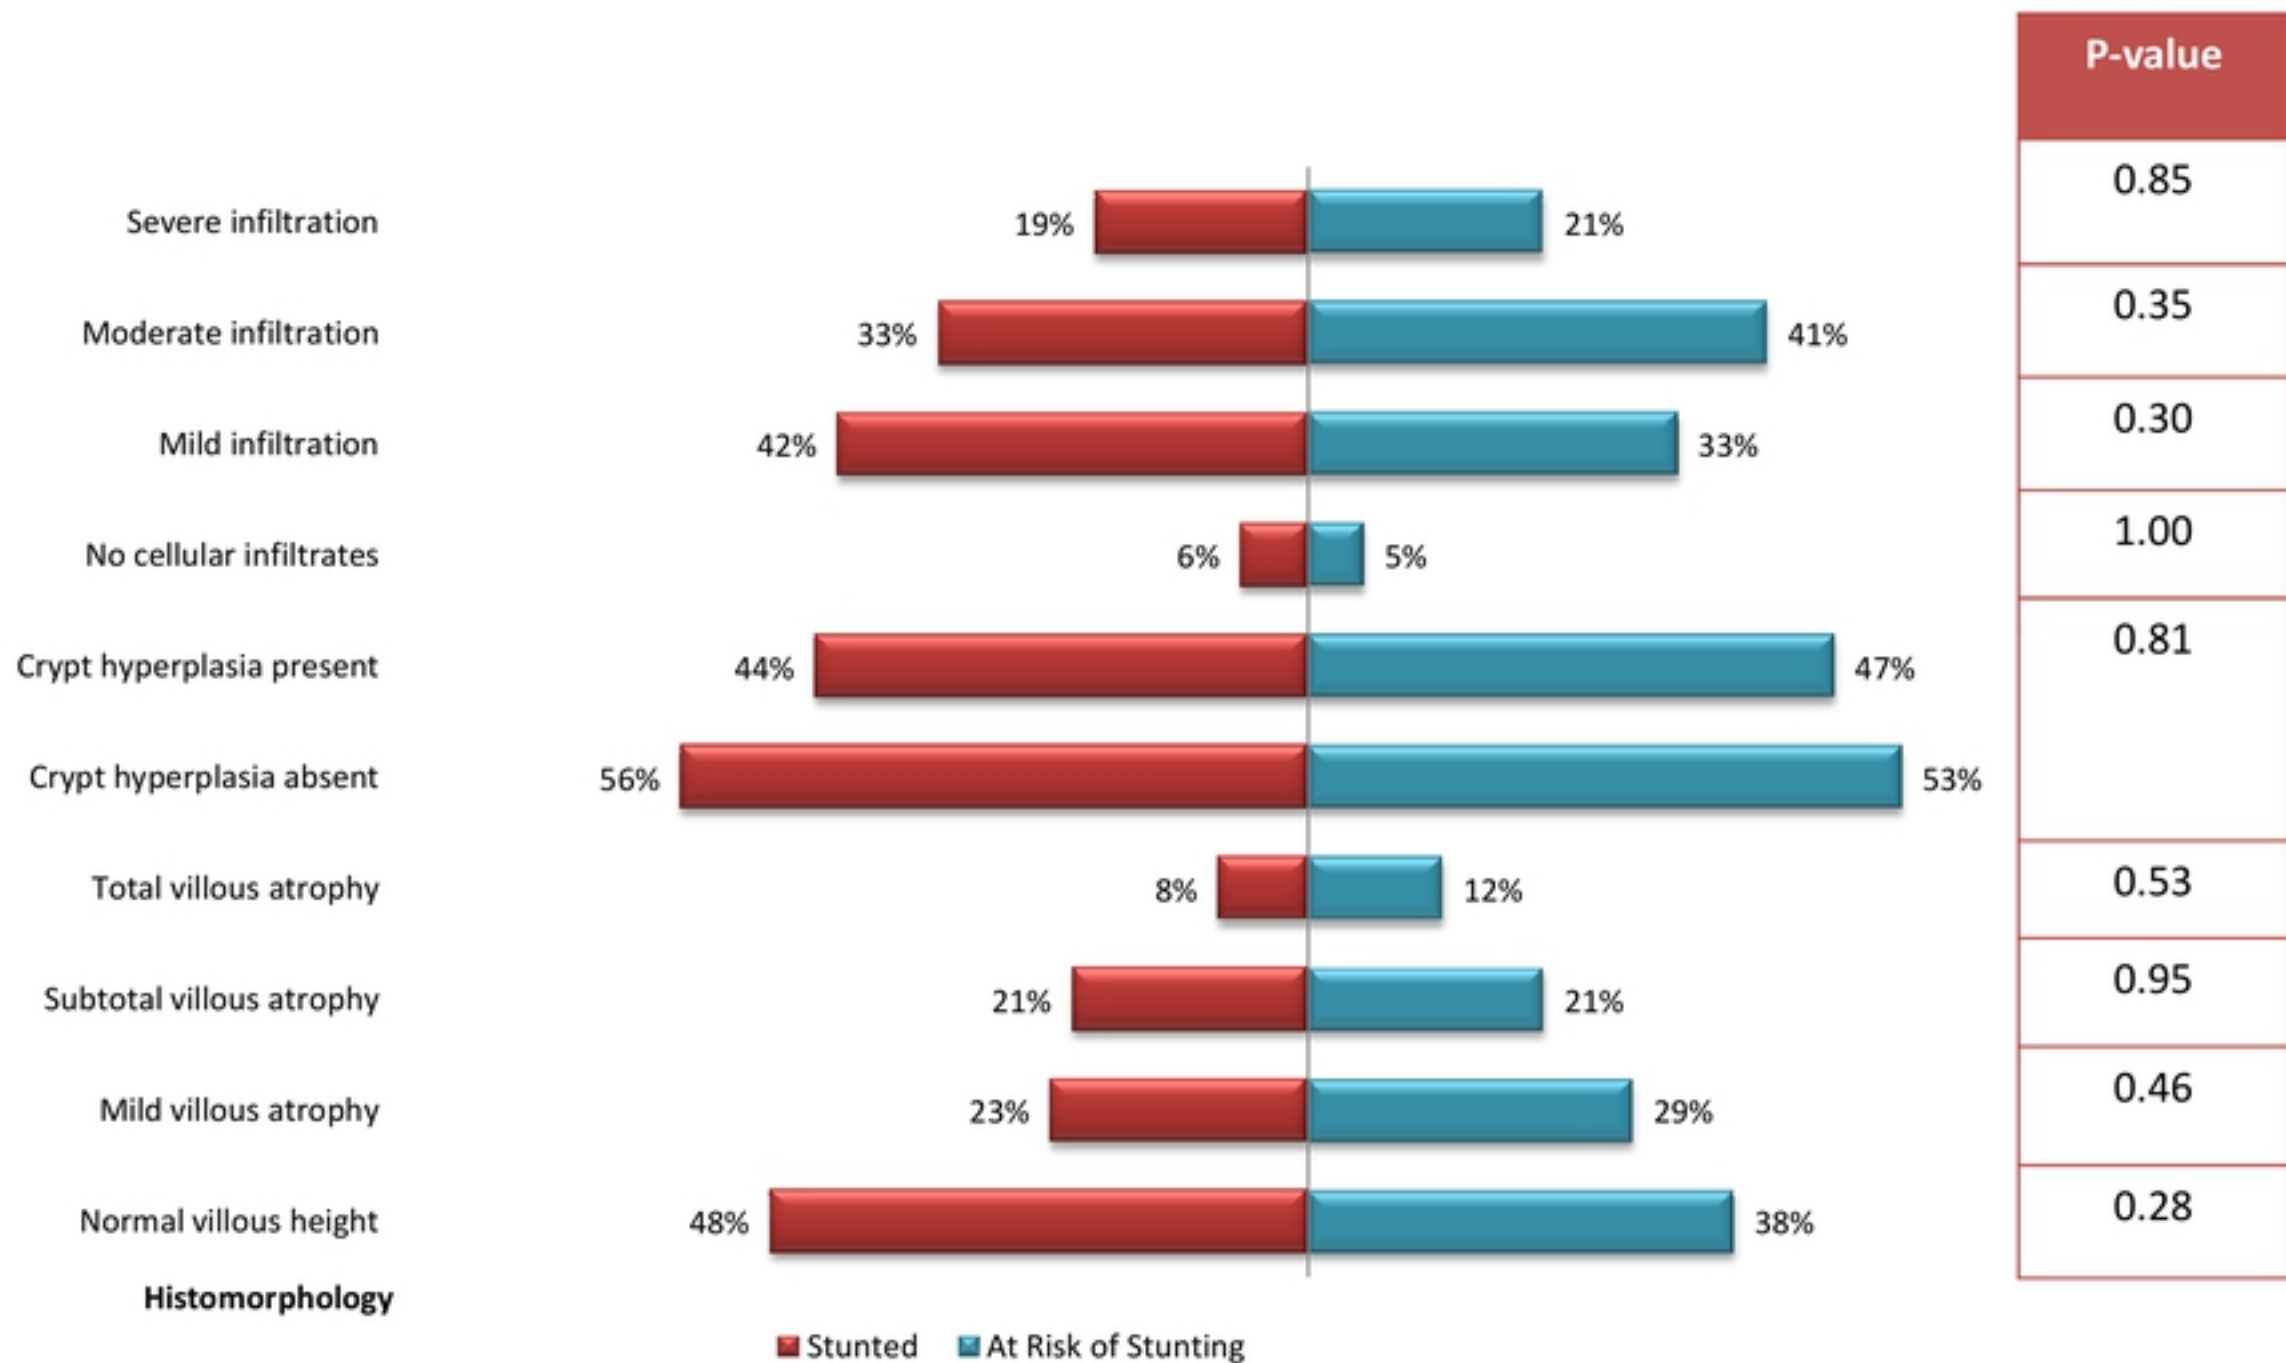

Figure 4
